# Supplementary material
Source: publisher figshare collection journal article supplement (https://acs.figshare.com/ndownloader/files/4355041)
Supplement: Supplementary file 1 [file 4355041]

## Supporting Online Information

# A Study on the Transesterification of Methyl Aryl Phosphorothioates in Methanol Promoted by Cd(II), Mn(II) and a Synthetic Pd(II) Complex.

*David R. Edwards, Alexei A. Neverov and R. Stan Brown\**

Department of Chemistry, Queen's University, Kingston, Ontario, Canada, K7L 3N6

Email: [rsbrown@chem.queensu.ca](mailto:rsbrown@chem.queensu.ca)

Phone: 613-533-2400

Fax: 613-533-6669

Contents:

|                                                                          |    |
|--------------------------------------------------------------------------|----|
| Materials.....                                                           | S2 |
| Methods.....                                                             | S2 |
| Preparation of <b>2a-e</b> and analytical data.....                      | S5 |
| Plots of observed rate constants versus [M(II)], [M(III)] and [OMe]..... | S7 |

Tables of observed rate constants for **3** catalyzed methanolysis reactions.....S8

Data from temperature studies.....S13

Determination of the speciation of **6** and a function of pH.....S14

## 1. Materials.

Sodium methoxide (0.5 M solution in methanol, titrated against N/50 Fisher Certified standard aqueous HCl solution and found to be 0.49 M), NBu<sub>4</sub>OMe (1.0 M solution in methanol, titrated against N/50 Fisher Certified standard aqueous HCl solution), Ag(CF<sub>3</sub>SO<sub>3</sub>), dimethyl chlorothiophosphate (98%), 2-chloro-4-nitrophenol (97%), 4-nitrophenol (98%), 4-chlorophenol (99+%), phenol (99%), sodium hydride (60% dispersion in mineral oil) and La(CF<sub>3</sub>SO<sub>3</sub>)<sub>3</sub> (99.999% metals basis) were purchased from Aldrich and used without further purification. Anhydrous methanol and tetrahydrofuran were acquired from EMD chemicals. Methyl aryl phosphorothioates **2a-d** were prepared from the corresponding dimethyl aryl phosphorothioates by LiCl promoted mono-demethylation in acetone.<sup>1</sup> The <sup>1</sup>H NMR, <sup>31</sup>P NMR, and mass spectra obtained were all consistent with the structures. Purity of **2a-d** is estimated to be >95% as determined by complete methanolysis and comparison of the extinction coefficients of the product solutions to that of the authentic phenols. Sodium *O,O*-dimethyl phosphorothioate (**2e**) was prepared by hydrolysis of dimethyl chlorothiophosphate in THF/H<sub>2</sub>O. Catalyst **3** can be obtained by treating a methanol solution containing di- $\mu$ -chlorobis(*N,N*-dimethylbenzylamine-2-C,N)dipalladium(II)<sup>2</sup> with two equivalents of Ag(OTf) followed by sonication at room temperature for 10 minutes and subsequent centrifugation to remove AgCl. Typically, stock solutions of **3** were prepared at < 10 mM and used immediately. An alternative method to prepare **3** *in situ* consisted of addition to the reaction solution of di- $\mu$ -chlorobis(*N,N*-dimethylbenzylamine-2C,N)dipalladium(II) (10-20 mM in CH<sub>2</sub>Cl<sub>2</sub>) in the presence of 2 mM La(OTf)<sub>3</sub>. Control experiments indicated that the rate of reaction for cleavage of **2b** was experimentally indistinguishable using the two methods to prepare **3**. The pincer palladacycle, **4** was prepared according to a published procedure.<sup>3</sup>

## 2. Methods

**2.1  $^s\text{pH}$  measurement.** The  $\text{CH}_3\text{OH}_2^+$  concentrations were determined potentiometrically using a combination glass electrode (Radiometer model XC100-111-120-161) calibrated with certified standard aqueous buffers (pH = 4.00 and 10.00) as described previously.<sup>4</sup> The  $^s\text{pH}$  values in methanol were obtained by subtracting a correction constant of  $-2.24^4$  from the electrode readings: the autoprotolysis constant for methanol was taken to be  $10^{-16.77} \text{ M}^2$ . The  $^s\text{pK}_a$  values of the substituted phenols in methanol used in this study can be found in a previous report.<sup>5</sup>

### 2.2. $^{31}\text{P}$ NMR spectrum of **3:2e**.

A deuterium lock was obtained on  $\text{CD}_3\text{OD}$  in an NMR tube containing **2e**, and the magnetic field was shimmed and the probe tuned to  $^{31}\text{P}$ . The blank sample was ejected and replaced with one containing **2e** (1.5 mM) and **3** (3.0 mM) in neutral  $\text{CH}_3\text{OH}$ . The  $^{31}\text{P}$  NMR spectrum was obtained on the unlocked sample at 298 K on a spectrometer operating at 202 MHz. Chemical shifts are referenced to 70% phosphoric acid.

### 2.3. Kinetics.

**2.3.1. Metal ion promoted methanolysis of **2b**.** The kinetic data for the metal ion promoted methanolysis of **2b** was obtained using standard UV-vis spectrophotometry at 25 °C. The metal ions  $\text{La}(\text{OTf})_3$ ,  $\text{Cd}(\text{ClO}_4)_2$ ,  $\text{Mn}(\text{OTf})_2$  or **3** were first added to the UV-cells followed by the addition of one half equivalent of NaOMe. Reactions were initiated by the addition of **2b** ( $9 \times 10^{-5} \text{ M}$ ) and the reaction progress monitored for at least five half lives at 336 nm (Cd(II)), 338 nm (La(III)), 390 nm (Mn(II)) and 320 nm (**3**). Observed rate constants were determined by fits of the plots of absorbance vs time data to a standard first order exponential equation. Plots of  $k_{\text{obs}}$  versus [metal ion] are shown in the Supporting Information along with a description of the treatment of the rate data to obtain the second order rate constants listed in Table 1.

**2.3.2  $s_p$ H rate profile for the 3-catalyzed methanolysis of 2b.** Plots of  $k_{\text{obs}}$  versus [3] for the methanolysis of **2b** ( $2 \times 10^{-5}$  M) were fit to equation 2 over the  $s_p$ H range 5.6-14.95,  $T = 25$  °C. A standard UV-vis spectrophotometer was used to monitor all reactions except those run at  $s_p$ H 11.35, 14.07 and 14.95 which required the use of a stopped-flow reaction analyzer. For this series of experiments, constant  $s_p$ H was maintained using the following buffer systems: 2.6 mM Yb(OTf)<sub>3</sub>/2.6 mM NaOMe ( $s_p$ H 5.60), La(OTf)<sub>3</sub> and various ratios of NaOMe ( $s_p$ H 7.06-11.35) and excess NaOMe ( $s_p$ H 14.07-14.95). Reactions were monitored at 320 nm ( $s_p$ H 5.60), 338 nm ( $s_p$ H 7.06-11.35) and 400 nm ( $s_p$ H > 14). The  $s_p$ H rate profile (Figure 5) was constructed using catalytic rate constants ( $k_{\text{cat}}^{\text{corr}}$ ) corrected for buffer catalysis as described in the Results section.

### 2.3.3 Linear free energy relationship for the 3-catalyzed methanolysis of phosphorothioates 2.

Plots of  $k_{\text{obs}}$  versus [3] were determined for **2a-d** ( $5 \times 10^{-5}$  M) at  $s_p$ H 8.7 ( $[\text{La}^{3+}] = [\text{OMe}] = 2$  mM) and the catalytic rate constants computed from the fits of the rate data to eq. 2 (*vide infra*) were corrected for buffer catalysis to determine  $k_{\text{cat}}^{\text{corr}}$  as described in the Results section. Reaction progress was monitored at 400 nm (**2a**), 338 nm (**2b**), 284 nm (**2c**), 277 nm (**2d**). Plots of  $k_{\text{obs}}$  vs [3] were determined for methanolysis of **2b-d** ( $5 \times 10^{-5}$  M) at  $s_p$ H 14.1 in the presence of 2 mM NaOMe,  $T = 25$  °C and fits of the rate data to eq. 2 provided the kinetic parameters listed in Table 3.

**2.3.4 Activation parameters for the 3-catalyzed methanolysis of 2b.** The activation parameters for the **3** ( $1.2 \times 10^{-4}$  M) catalyzed methanolysis of substrate **2b** ( $5 \times 10^{-5}$  M) were determined at  $s_p$ H 8.8 in the presence of  $[\text{La}^{3+}] = [\text{NaOMe}] = 1.68, 3.36$  and 5.04 mM over a temperature range spanning 10-43

°C. The  $k_2^{\text{La}}$  and  $k_{\text{cat}}^{\text{corr}}$  data were obtained as the gradients and y-intercepts respectively in the plots of  $k_{\text{obs}}$  versus  $[\text{La}^{3+}]_{\text{total}}$ . Fitting the data to the Eyring equation provided the activation parameters.

**2.4. UV-vis titration of 3 with 2e.** The UV-vis spectrum of a neutral unbuffered methanol solution containing **3** ( $5.8 \times 10^{-5}$  M) was obtained from 400 to 250 nm at 25°C. Aliquots of **2e** ( $1.8 \times 10^{-5}$  M) were sequentially added and the UV-vis spectrum obtained. The absorbance at  $\lambda = 325$  nm was recorded as a function of [**2e**] as shown in Figure 2.

#### **General method for the preparation of 2a-d.**

The following method is general for the preparation of **2a-d**. Into a round bottomed flask equipped with a magnetic stirring bar was added (1.34g, 10 mmol) 2-chloro-4-nitrophenol to 30 ml anhydrous tetrahydrofuran. The reaction vessel was cooled in an ice bath prior to the addition of (440 mg, 11 mmol) sodium hydride as a 60% dispersion in mineral oil. The reaction vessel was left to warm to room temperature and then (720 mg, 4.5 mmol) dimethyl chlorothiophosphate was added dropwise. The reaction was left to stir at ambient temperature for 24 hours prior to the removal of the volatiles under reduced pressure. The crude material was taken up in diethyl ether, washed with saturated aqueous  $\text{K}_2\text{CO}_3$  (x3), brine (x1), dried with  $\text{MgSO}_4$  and the volatiles removed under reduced pressure. The crude material was then taken up in 20 ml acetone and to this was added (420 mg, 10 mmol) LiCl and (26 mg, 0.1 mmol) 18-crown-6. The reaction was left to stir at ambient temperature for 48 hours and then acetone was removed under reduced pressure. The white solid residue was taken up in water, washed with  $\text{CH}_2\text{Cl}_2$  (x 2). The aqueous layer was acidified to pH ~1 and washed with  $\text{CH}_2\text{Cl}_2$  (x2). Next the aqueous layer was acidified to 6 M HCl and extracted with  $\text{CH}_2\text{Cl}_2$  until the organic fraction no longer showed a UV observable spot by TLC analysis. The collected organic fractions were combined and solvent removed under reduced pressure to reveal compound **2a** in its protonated form in a yield of 28%. The title compounds **2a-d** were generally treated with 0.95 equivalents of methoxide and stored as stock solutions in methanol placed in the fridge. The analytical data for new compounds **2a,c,d** is presented

below. The analytical data determined for **2b** in the current study is consistent with its structure as reported.<sup>6</sup>

Analytical data:

*Methyl 2-chloro-4-nitrophenylphosphorothioate 2a* (H<sup>+</sup>-form): <sup>1</sup>H NMR (500 MHz, D<sub>2</sub>O) δ 8.29-8.41 (1H, m, ArH), δ 8.04-8.17 (1H, m, ArH), δ 7.44-7.58 (1H, m, ArH), δ 3.73 (3H, d, P-OCH<sub>3</sub> J = 13.2 Hz). <sup>13</sup>C NMR (125.8 MHz, D<sub>2</sub>O) δ 153.55, δ 143.74, δ 126.79, δ 126.27, δ 123.97, δ 122.04 and δ 54.34. <sup>31</sup>P NMR (202.5 MHz, D<sub>2</sub>O) δ 55.24. λ<sub>max</sub>(MeOH)/nm 289 (ε/M<sup>-1</sup>cm<sup>-1</sup> 6238 ±303). HRMS (ESI-TOF) calculated for C<sub>7</sub>H<sub>6</sub>O<sub>5</sub>PSNCl [M-H]<sup>-</sup> 281.9386 m/e; found 281.9392.

*Methyl 4-chlorophenylphosphorothioate 2c* (Na<sup>+</sup>-form): <sup>1</sup>H NMR (500 MHz, CD<sub>3</sub>OD) δ 7.16-7.27 (4H, m, ArH), δ 3.67 (3H, d, P-OCH<sub>3</sub> J = 13.21 Hz). <sup>13</sup>C NMR (125.8 MHz, CD<sub>3</sub>OD) δ 127.44, δ 126.96, δ 121.11 and δ 51.49 (*ipso* P-OAr carbon not observed). <sup>31</sup>P NMR (202.5 MHz, CD<sub>3</sub>OD) δ 55.02. λ<sub>max</sub>(MeOH)/nm 272 (ε/M<sup>-1</sup>cm<sup>-1</sup> 261). HRMS (ESI-TOF) calculated for C<sub>7</sub>H<sub>7</sub>O<sub>3</sub>PSCl [M-Na]<sup>+</sup> 236.9539 m/e; found 236.9542.

*Methyl phenylphosphorothioate 2d* (Na<sup>+</sup>-form): <sup>1</sup>H NMR (600 MHz, CD<sub>3</sub>OD) δ 7.18-7.28 (4H, m, ArH), δ 7.01-7.06 (1H, m, ArH), δ 3.67 (3H, d, P-OCH<sub>3</sub> J = 12.84 Hz). <sup>31</sup>P NMR (243 MHz, CD<sub>3</sub>OD) δ 54.66. λ<sub>max</sub>(MeOH)/nm 264 (ε/M<sup>-1</sup>cm<sup>-1</sup> 223). HRMS (ESI-TOF) calculated for C<sub>7</sub>H<sub>7</sub>O<sub>3</sub>PSCl [M-Na]<sup>+</sup> 202.9922 m/e; found 202.9931.

**Preparation of dimethyl phosphorothioate (2e).** (3.2 g, 20 mmol) Dimethyl chlorothiophosphate was added dropwise to a round bottomed flask containing 20 ml THF, 10 ml H<sub>2</sub>O and (1.7 g, 42 mmol) NaOH. The reaction was left to stir for 2 hours and then the volatile organic material removed under reduced pressure. The alkaline aqueous solution was washed with CH<sub>2</sub>Cl<sub>2</sub> (x2) and then acidified to 6 M HCl. The acidic aqueous solution was then extracted with CH<sub>2</sub>Cl<sub>2</sub> (x4) to collect dimethyl phosphorothioate in its protonated form. The organic layer was concentrated under reduced pressure, taken up in 10 ml water and passed through an ion exchange column (Na<sup>+</sup> form). Sodium dimethyl

phosphorothioate was obtained in a 50% yield.  $^1\text{H}$  and  $^{31}\text{P}$  NMR data were consistent with the proposed structure.<sup>7</sup>

### 3. Plots of $k_{\text{obs}}$ versus [metal] or $[\text{NBu}_4\text{OMe}]$ for the methanolysis of **2b**.

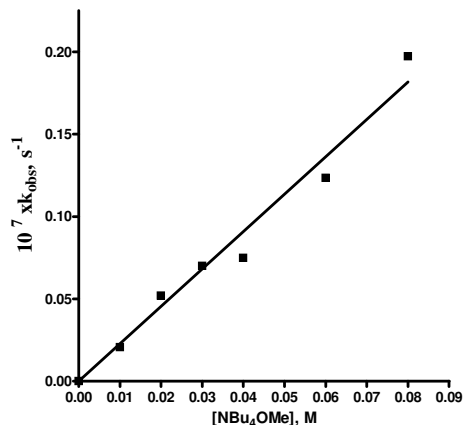

Figure S1: Plot of  $k_{\text{obs}}$  versus  $[\text{NBu}_4\text{OMe}]$  for the methanolysis of **2b** ( $9 \times 10^{-5}$  M) at 25 °C determined by UV-vis spectrophotometry for product formation at 399 nm. A standard linear regression provides the second order rate constant  $k_2 = (2.3 \pm 0.2) \times 10^{-7} \text{ M}^{-1}\text{s}^{-1}$  ( $r^2$  0.9736, 6 data).

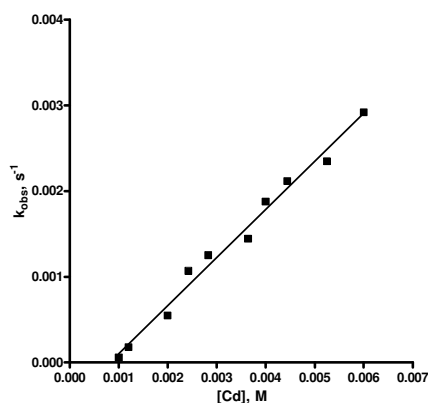

Figure S2: Plot of  $k_{\text{obs}}$  versus  $[\text{Cd}(\text{ClO}_4)_2]$  for the methanolysis of **2b** ( $9 \times 10^{-5}$  M) at 25 °C,  $\text{pH } 10.0$  determined by UV-vis spectrophotometry for product formation at 336 nm. A standard linear regression provides the second order rate constant  $k_2 = 0.56 \pm 0.02 \text{ M}^{-1}\text{s}^{-1}$  and an observable x-intercept of  $8.1 \pm 0.2$  M ( $r^2$  0.9859, 10 data).<sup>8</sup>

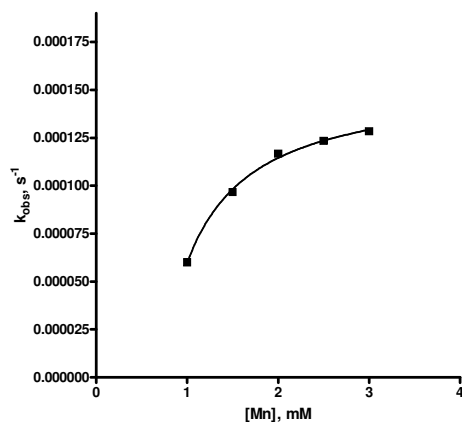

Figure S3: Plot of  $k_{\text{obs}}$  versus  $[\text{Mn}(\text{OTf})_2]$  for the methanolysis of **2b** ( $9 \times 10^{-5} \text{ M}$ ) at  $25 \text{ }^\circ\text{C}$ ,  $\text{pH } 9.6$  determined by UV-vis spectrophotometry for product formation at 390 nm. A fit of the data to the universal binding equation 2 of the main text provides  $k_{\text{cat}} = (1.54 \pm 0.06) \times 10^{-4} \text{ s}^{-1}$ ,  $K_{\text{b}} = 2.3 \pm 0.5 \text{ mM}^{-1}$  and an observable x-intercept of  $0.70 \pm 0.04 \text{ mM}$ .<sup>8</sup> The second order rate constant is calculated as  $k_2 = k_{\text{cat}} \times K_{\text{b}} = 0.35 \text{ M}^{-1}\text{s}^{-1}$ .

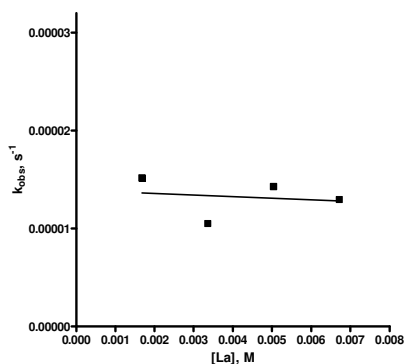

Figure S4: Plot of  $k_{\text{obs}}$  versus  $[\text{La}(\text{OTf})_3]$  for the methanolysis of **2b** ( $9 \times 10^{-5} \text{ M}$ ) at  $25 \text{ }^\circ\text{C}$ ,  $\text{pH } 8.4$  determined by UV-vis spectrophotometry for product formation at 338 nm. An average observed rate constant of  $(1.3 \pm 0.2) \times 10^{-5} \text{ s}^{-1}$  is determined.

**Note 1:** The second order rate constant for methanolysis of **2b** ( $9 \times 10^{-5} \text{ M}$ ) at  $25 \text{ }^\circ\text{C}$ ,  $\text{pH } 11.2$  catalyzed by **3** ( $5 \times 10^{-4} \text{ M}$ ) as reported in Table 1 of the main text was calculated by first determining an observed rate constant of  $0.13 \text{ s}^{-1}$  under conditions of saturating metal ion by following product formation at 400 nm. The second order rate constant was then obtained by  $k_2 = k_{\text{cat}} \times K_{\text{b}} = 0.13 \text{ s}^{-1} \times (4.2 \times 10^5) \text{ M}^{-1} = (5.5 \pm 1.7) \times 10^4 \text{ M}^{-1}\text{s}^{-1}$ . The binding constant used in this calculation came from UV-vis spectrophotometric titration of **3** with dimethylphosphorothioate.

#### 4. Tables of observed rate constants for the methanolysis of **2b** catalyzed by **3** ( $5.60 \leq \text{pH} \leq 14.95$ , $T = 25 \text{ }^\circ\text{C}$ ).

Table S1: Observed rate constants determined for the **3** catalyzed methanolysis of **2b** determined at  $\text{pH } 5.60$ ,  $25 \text{ }^\circ\text{C}$ . The reported observed rate constants are the average of duplicate runs.



| [ <b>3</b> ], mM      | $k_{\text{obs}}$ , minutes <sup>-1</sup> |
|-----------------------|------------------------------------------|
| $0.58 \times 10^{-1}$ | 0.36                                     |
| $0.86 \times 10^{-1}$ | 0.50                                     |
| 0.12                  | 0.55                                     |
| 0.17                  | 0.67                                     |
| 0.23                  | 0.65                                     |
| 0.29                  | 0.67                                     |

Table S2: Observed rate constants determined for the **3** catalyzed methanolysis of **2b** determined at  $s$  pH 7.06, 25 °C. The reported observed rate constants are the average of duplicate runs.

| 10 x [ <b>3</b> ], mM | $k_{\text{obs}}$ , minutes <sup>-1</sup> |
|-----------------------|------------------------------------------|
| 0.16                  | 0.15                                     |
| 0.32                  | 0.33                                     |
| 0.48                  | 0.44                                     |
| 0.64                  | 0.46                                     |
| 0.96                  | 0.51                                     |
| 1.1                   | 0.55                                     |

Table S3: Observed rate constants determined for the **3** catalyzed methanolysis of **2b** determined at  $s$  pH 7.65, 25 °C. The reported observed rate constants are the average of duplicate runs. The catalytic rate constant,  $k_{\text{cat}}$ , was corrected for buffer effects using the equation  $k_{\text{cat}} = (2.87 \pm 0.12 \text{ M}^{-1} \text{ s}^{-1})[\text{La}^{3+}] + (1.41 \pm 0.05) \times 10^{-2} \text{ s}^{-1}$ ; where  $k_{\text{cat}}^{\text{corr}}$  at  $[\text{La}] = 0 \text{ M}$  is determined to be  $(1.41 \pm 0.05) \times 10^{-2} \text{ s}^{-1}$ .

| 10 x [ <b>3</b> ], mM | $k_{\text{obs}}$ , minutes <sup>-1</sup> |
|-----------------------|------------------------------------------|
| 0.08                  | 0.30                                     |
| 0.16                  | 0.44                                     |
| 0.32                  | 0.77                                     |
| 0.40                  | 0.93                                     |
| 0.56                  | 1.07                                     |
| 0.80                  | 1.18                                     |
| 2.4                   | 1.20                                     |

Table S4: Observed rate constants determined for the **3** catalyzed methanolysis of **2b** determined at  $s$ pH 8.80, 25 °C. The reported observed rate constants are the average of duplicate runs. The catalytic rate constant,  $k_{\text{cat}}$ , was corrected for buffer effects using the equation  $k_{\text{cat}} = (7.55 \pm 0.64 \text{ M}^{-1}\text{s}^{-1})[\text{La}^{3+}] + (2.61 \pm 0.20) \times 10^{-2} \text{ s}^{-1}$ ; where  $k_{\text{cat}}^{\text{corr}}$  at  $[\text{La}] = 0 \text{ M}$  is determined to be  $(2.61 \pm 0.20) \times 10^{-2} \text{ s}^{-1}$ .

| 10 x [3], mM         | $k_{\text{obs}}$ , minutes <sup>-1</sup> |
|----------------------|------------------------------------------|
| $3.8 \times 10^{-1}$ | 0.29                                     |
| $9.6 \times 10^{-1}$ | 1.24                                     |
| 0.15                 | 1.62                                     |
| 0.23                 | 2.04                                     |
| 0.28                 | 2.12                                     |
| 0.29                 | 2.31                                     |
| 0.31                 | 2.38                                     |
| 0.46                 | 2.45                                     |
| 0.77                 | 2.54                                     |

Table S5: Observed rate constants determined for the **3** catalyzed methanolysis of **2b** determined at  $s$ pH 10.38, 25 °C. The reported observed rate constants are the average of duplicate runs. The catalytic rate constant,  $k_{\text{cat}}$ , was corrected for buffer effects using the equation  $k_{\text{cat}} = (1.18 \pm 0.22 \text{ M}^{-1}\text{s}^{-1})[\text{La}^{3+}] + (4.56 \pm 0.09) \times 10^{-2} \text{ s}^{-1}$ ; where  $k_{\text{cat}}^{\text{corr}}$  at  $[\text{La}] = 0 \text{ M}$  is determined to be  $(4.56 \pm 0.09) \times 10^{-2} \text{ s}^{-1}$ .

| 10 x [3], mM | $k_{\text{obs}}$ , minutes <sup>-1</sup> |
|--------------|------------------------------------------|
| 0.16         | 0.74                                     |
| 0.24         | 1.11                                     |
| 0.32         | 1.77                                     |
| 0.60         | 2.41                                     |
| 0.80         | 2.56                                     |
| 1.2          | 2.47                                     |

Table S6: Observed rate constants determined for the **3** catalyzed methanolysis of **2b** determined at  $s$ pH 11.35, 25 °C. This set of reactions was run on an Applied Photophysics SX-17MV stopped-flow reaction analyzer and observed rate constants represent the average of at least 3 determinations. The catalytic rate constant,  $k_{\text{cat}}$ , was corrected for buffer effects using the equation  $k_{\text{cat}} = (14.84 \pm 1.70 \text{ M}^{-1}\text{s}^{-1})[\text{La}^{3+}] + (3.28 \pm 0.26) \times 10^{-1} \text{ s}^{-1}$ ; where  $k_{\text{cat}}^{\text{corr}}$  at  $[\text{La}] = 0 \text{ M}$  is determined to be  $(3.28 \pm 0.26) \times 10^{-1} \text{ s}^{-1}$ .

| 10 x [3], mM | $k_{\text{obs}}, \text{s}^{-1}$ |
|--------------|---------------------------------|
| 0.29         | 0.085                           |
| 0.58         | 0.74                            |
| 0.86         | 1.11                            |
| 1.44         | 1.77                            |

Table S7: Observed rate constants determined for the **3** catalyzed methanolysis of **2b** determined at  $\text{pH } 14.07$ ,  $25\text{ }^\circ\text{C}$ . This set of reactions was run on an Applied Photophysics SX-17MV stopped-flow reaction analyzer and observed rate constants represent the average of at least 3 determinations.

| 10 x [3], mM | $k_{\text{obs}}, \text{s}^{-1}$ |
|--------------|---------------------------------|
| 0.22         | 0.58                            |
| 0.43         | 2.63                            |
| 0.86         | 4.33                            |
| 1.30         | 4.66                            |
| 1.72         | 4.80                            |

Table S8: Observed rate constants determined for the **3** catalyzed methanolysis of **2b** determined at  $\text{pH } 14.95$ ,  $25\text{ }^\circ\text{C}$ . This set of reactions was run on an Applied Photophysics SX-17MV stopped-flow reaction analyzer and observed rate constants represent the average of at least 3 determinations.

| 10 x [3], mM | $k_{\text{obs}}, \text{s}^{-1}$ |
|--------------|---------------------------------|
| 0.22         | 0.23                            |
| 0.43         | 0.58                            |
| 0.86         | 2.04                            |
| 1.30         | 3.30                            |
| 1.72         | 4.22                            |
| 2.59         | 5.27                            |
| 3.0          | 4.99                            |

**Tables of observed rate constants for the methanolysis of 2acd catalyzed by 3 at  $\text{pH } 7.60$  and  $14.1, T = 25 \text{ }^\circ\text{C}$ .**

Table S9: Observed rate constants determined for the **3** catalyzed methanolysis of **2a** determined at  $\text{pH } 7.60, 25 \text{ }^\circ\text{C}$ . The reported observed rate constants are the average of duplicate runs. Buffer catalysis was not observed for reaction of **2a** and so the  $k_{\text{cat}}$  determined directly from equation 2 of the main text was used in the construction of the Brønsted plot.

| $10 \times [\mathbf{3}], \text{ mM}$ | $k_{\text{obs}}, \text{ minutes}^{-1}$ |
|--------------------------------------|----------------------------------------|
| 0.19                                 | 0.35                                   |
| 0.38                                 | 0.76                                   |
| 0.56                                 | 0.96                                   |
| 0.75                                 | 1.09                                   |
| 1.13                                 | 1.26                                   |

Table S10: Observed rate constants determined for the **3** catalyzed methanolysis of **2c** determined at  $\text{pH } 7.60, 25 \text{ }^\circ\text{C}$ . The reported observed rate constants are the average of duplicate runs. The catalytic rate constant,  $k_{\text{cat}}$ , was corrected for buffer effects using the equation  $k_{\text{cat}} = (4.33 \pm 0.65 \text{ M}^{-1}\text{s}^{-1})[\text{La}^{3+}] + (1.9 \pm 0.1) \times 10^{-1} \text{ s}^{-2}$ ; where  $k_{\text{cat}}^{\text{corr}}$  at  $[\text{La}] = 0 \text{ M}$  is determined to be  $(1.9 \pm 0.1) \times 10^{-1} \text{ s}^{-2}$ .

| $10 \times [\mathbf{3}], \text{ mM}$ | $k_{\text{obs}}, \text{ minutes}^{-1}$ |
|--------------------------------------|----------------------------------------|
| 0.14                                 | 0.40                                   |
| 0.29                                 | 0.72                                   |
| 0.58                                 | 1.06                                   |
| 0.86                                 | 1.32                                   |
| 1.15                                 | 1.28                                   |
| 1.44                                 | 1.46                                   |

Table S11: Observed rate constants determined for the **3** catalyzed methanolysis of **2d** determined at  $\text{pH } 7.60, 25 \text{ }^\circ\text{C}$ . The reported observed rate constants are the average of duplicate runs. The catalytic rate constant,  $k_{\text{cat}}$ , was corrected for buffer effects using the equation  $k_{\text{cat}} = (4.39 \pm 0.63 \text{ M}^{-1}\text{s}^{-1})[\text{La}^{3+}] + (1.55 \pm 0.27) \times 10^{-1} \text{ s}^{-2}$ ; where  $k_{\text{cat}}^{\text{corr}}$  at  $[\text{La}] = 0 \text{ M}$  is determined to be  $(1.55 \pm 0.27) \times 10^{-1} \text{ s}^{-2}$ .

| $10 \times [\mathbf{3}], \text{ mM}$ | $k_{\text{obs}}, \text{ minutes}^{-1}$ |
|--------------------------------------|----------------------------------------|
|--------------------------------------|----------------------------------------|

|      |      |
|------|------|
| 0.29 | 0.82 |
| 0.43 | 1.22 |
| 0.58 | 1.27 |
| 0.86 | 1.49 |
| 1.15 | 1.50 |
| 1.44 | 1.48 |

Table S12: Observed rate constants determined for the **3** catalyzed methanolysis of **2c** determined at  $s_p$  pH 14.1, 25 °C. The reported observed rate constants are the average of duplicate runs.

| $10^4 \times [\mathbf{3}], \text{M}$ | $k_{\text{obs}}, \text{minutes}^{-1}$ |
|--------------------------------------|---------------------------------------|
| 0.21                                 | 1.74                                  |
| 0.42                                 | 2.44                                  |
| 0.64                                 | 2.53                                  |
| 0.85                                 | 2.61                                  |
| 1.06                                 | 2.62                                  |
| 1.27                                 | 2.62                                  |

Table S13: Observed rate constants determined for the **3** catalyzed methanolysis of **2d** determined at  $s_p$  pH 14.1, 25 °C. The reported observed rate constants are the average of duplicate runs.

| $10^4 \times [\mathbf{3}], \text{M}$ | $k_{\text{obs}}, \text{minutes}^{-1}$ |
|--------------------------------------|---------------------------------------|
| 0.21                                 | $0.65 \times 10^{-1}$                 |
| 0.42                                 | 0.15                                  |
| 0.64                                 | 0.25                                  |
| 0.85                                 | 0.30                                  |
| 1.06                                 | 0.36                                  |
| 1.30                                 | 0.38                                  |

## 5. Determination of the activation parameters for the methanolysis of **2b** catalyzed by **3** at 25 °C.

The activation parameters for the **3** ( $1.2 \times 10^{-4} \text{ M}$ ) catalyzed methanolysis of substrate **2b** ( $5 \times 10^{-5} \text{ M}$ ) were determined at  $s_p$  pH 8.8 in the presence of  $[\text{La}^{3+}] = [\text{NaOMe}] = 1.68, 3.36$  and  $5.04 \text{ mM}$  over a temperature range spanning 10- 43 °C. The  $k_2^{\text{La}}$  and  $k_{\text{cat}}^{\text{corr}}$  data were obtained as the gradients and y-

intercepts respectively in the plots of  $k_{\text{obs}}$  versus  $[\text{La}^{3+}]_{\text{total}}$ . Fitting the rate data to the Eyring equation provided the activation parameters. The observed rate constants listed below are averages of duplicate runs.

| Temperature, Kelvin | $[\text{La}^{3+}] = [\text{NaOMe}]$ , mM | $k_{\text{obs}}$ , minutes <sup>-1</sup> |
|---------------------|------------------------------------------|------------------------------------------|
| 283                 | 1.68                                     | 0.56                                     |
| 283                 | 3.36                                     | 1.06                                     |
| 283                 | 5.04                                     | 1.51                                     |
| 289                 | 1.68                                     | 0.85                                     |
| 289                 | 3.36                                     | 1.41                                     |
| 289                 | 5.04                                     | 1.88                                     |
| 298                 | 1.68                                     | 1.66                                     |
| 298                 | 3.36                                     | 2.48                                     |
| 298                 | 5.04                                     | 2.98                                     |
| 307                 | 1.68                                     | 2.58                                     |
| 307                 | 3.36                                     | 4.01                                     |
| 307                 | 5.04                                     | 4.78                                     |
| 316                 | 1.68                                     | 4.38                                     |
| 316                 | 3.36                                     | 5.91                                     |
| 316                 | 5.04                                     | 7.35                                     |

## 6. Ionization of **6** and alternative mechanisms for the pH independent pathway.

Scheme 1S

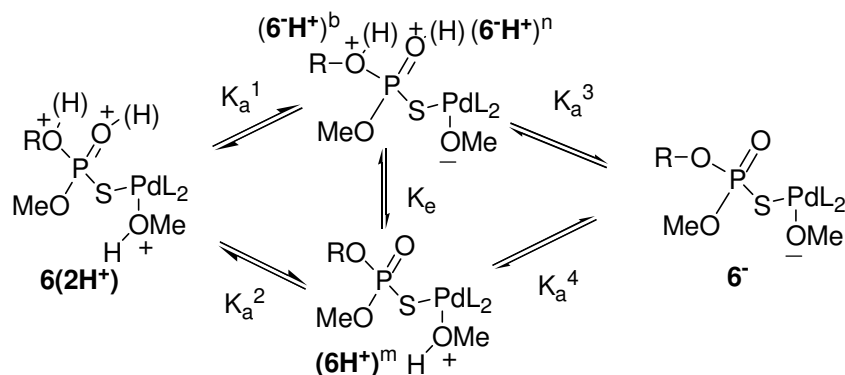

Speciation of **6** at different values  $^s\text{pH}$  can be described by the ionization diagram presented in Scheme

1S, where  $K_a^n$  refer to various microscopic  $^s\text{p}K_a$  values. Only one of the  $^sK_a^n$  values can be

determined experimentally, but for others an educated estimate can be given.

$^sK_a^4$  refers to the dissociation constant of a Pd-coordinated methanol molecule in the

palladacycle/substrate complex  $(6\text{H}^+)^m$ , experimentally determined to be  $10^{-12.7}$  M (see Figure 5 in the

main manuscript).  ${}^s K_a^{-2}$  can be estimated based on the  $pK_a$  determined for dissociation of the protonated phosphoryl oxygen of trimethyl phosphate or dimethyl phosphate in water<sup>9</sup> (-3.6 and -2.6). While phosphate ester **2** carries a negative charge, its coordination to the positively charged Pd(I) palladacycle and formation of a strong S-Pd interaction should result in a neutral, or close to neutral, charge for **2** in the bound form **6**. We therefore assume that the  ${}^s pK_a^{-2}$  of the phosphoryl-H<sup>+</sup> in the **6(2H<sup>+</sup>)** is ~-3, midway between that of protonated trimethyl phosphate and dimethyl phosphate, assuming that the differential effect of the solvent (water vs. methanol) should be quite limited due to the ionization process where the solvation of the species on each side of the equation is similar (HOS + <sup>+</sup>H-Sub  $\leftrightarrow$  H<sub>2</sub><sup>+</sup>OS + Sub), as is known to be the case for ionization of protonated amines, where the  $pK_a$  values in water and ethanol are quite similar<sup>10</sup>.

${}^s K_a^{-1}$  refers to the ionization of the Pd-coordinated methanol of complex (**6(2H<sup>+</sup>)**). While it is difficult to predict exactly the value of this constant it should lie between those for the for free palladacycle ( $-10^{10.8}$ )<sup>2</sup> and that of complex **6H<sup>+</sup>** ( $10^{-12.7}$ ) as found in this study, and probably closer to the former value considering the overall neutral charge of phosphate moiety in **6(2H<sup>+</sup>)**. We therefore assume that the value of  ${}^s K_a^{-1}$  is  $\sim 10^{-11.8}$ . In order to determine the value of  ${}^s K_a^{-3}$ , we consider the thermodynamic cycle  $K_a^{-1} K_a^{-3} = K_a^{-2} K_a^{-4}$  which allows us to calculate  $K_a^{-3} = K_a^{-2} K_a^{-4} / K_a^{-1} = 10^2 \text{ M}$  ( ${}^s pK_a^{-3} = -2$ ). Due to the wide spread between  ${}^s pK_a^{-2}$  and  ${}^s pK_a^{-4}$  (-3 and 12.7 correspondingly), the main form of **6** over the broad  ${}^s p\text{H}$  range between ~-2 and ~11 is **6H<sup>+</sup>** (depicted in the lower center of Scheme 1S) which exists in an isoprotonic equilibrium with the very minor form **6H<sup>+</sup>** (depicted in the upper corner of Scheme 6). The equilibrium constant between those two forms  $K_e$  can be determined as  $K_e = {}^s K_a^{-2} / {}^s K_a^{-1} = [(\mathbf{6H}^+)^m] / [(\mathbf{6H}^+)^n] = 10^{14.8}$ .

<sup>1</sup> Lassila, J. K.; Herschlag, D. *Biochemistry*, **2008**, *47*, 12853.

<sup>2</sup> Lu, Z.-L.; Neverov, A. A.; Brown, R. S. *Org. Biomol. Chem.* **2005**, *3*, 3379.

<sup>3</sup> Steenwinkel, P.; Gossage, R.A.; Maunula, T.; Grove, D.M.; Van Koten, G. *Chem. Eur. J.* **1998**, *4*, 763.

<sup>4</sup> Gibson, G.; Neverov, A. A.; Brown, R. S. *Can. J. Chem.* **2003**, *81*, 495.

<sup>5</sup> Neverov, A. A.; Liu, C. T.; Bunn, S. E.; Edwards, D. R.; White, C. J.; Melnychuk, S. A.; Brown, R. S. *J. Am. Chem. Soc.* **2008**, *130*, 6639.

<sup>6</sup> Lassila, J. K.; Herschlag, D. *Biochemistry*, **2008**, *47*, 12853.

<sup>7</sup> Kamer, P. C. J.; *Tetrahedron Letters* **1989**, *48*, 6757.

<sup>8</sup> An observable x-intercept in the plot of  $k_{\text{obs}}$  versus [metal] is consistent with the formation of catalytically active dimeric metal complexes. However study of this effect was not pursued in the current report.

<sup>9</sup> Azema, L.; Ladame, S.; Lapeyre, C.; Zwick, A.; Lakhdar-Ghazal, F. *Spectrochimica Acta Part A* **2005**, *62*, 287.

<sup>10</sup> Gibson, G. T. T.; Mohamed, M. F.; Neverov, A. A.; Brown, R. S. *Inorg. Chem.* **2006**, *45*, 7891.
